# Supplementary material
Source: publisher figshare collection journal article supplement (https://gsajournals.figshare.com/ndownloader/files/14641154)
Supplement: Supplementary file 1 [file 14641154]

## Sheet: Sheet1
Pigmentary function	Gene name (alternative gene name)	Ref. Tree in Ensembl v86	Reference 1	Reference 2	Reference 3	Reference 4	Further reading
-------------------
Pigment cell differentiation
-------------------
	bnc2	ENSGT00390000005844	Lang et al 2009 - Basonuclin-2 requirements for zebrafish adult pigment pattern development and female fertility.
	cdh2 (ncad)	ENSGT00760000118906	Piloto and Schelling 2010 - Ovo1 links Wnt signaling with N-cadherin localization during neural crest migration
	lef1	ENSGT00390000009964	Ishitani et al 2005 - Nrarp functions to modulate neural-crest-cell differentiation by regulating LEF1 protein stability
	nrarp	ENSGT00800000124147	Ishitani et al 2005 - Nrarp functions to modulate neural-crest-cell differentiation by regulating LEF1 protein stability
	ovol1	ENSGT00740000115492	Piloto and Schelling 2010 - Ovo1 links Wnt signaling with N-cadherin localization during neural crest migration
	wnt1	ENSGT00760000118943	Dunn et al 2000 Neural crest-directed gene transfer demonstrates Wnt1 role in melanocyte expansion and differentiation during mouse development	Dorsky et al 1998 Control of neural crest cell fate by the Wnt signalling pathway
	wnt3a	ENSGT00760000118943	Dunn et al 2005 WNT1 and WNT3a promote expansion of melanocytes through distinct modes of action	Dorsky et al 1998 Control of neural crest cell fate by the Wnt signalling pathway
-------------------
Leucophores
-------------------
	gch1	ENSGT00390000013481	Parichy et al 2000 - An orthologue of the kit-related gene fms is required for development of neural crest-derived xanthophores and a subpopulation of adult melanocytes in the zebrafish, Danio rerio
	pax7	ENSGT00680000099553	Kimura et al 2014 - Leucophores are similar to xanthophores in their specification and differentiation processes in medaka.
	slc2a11	ENSGT00760000119022	Kimura et al 2014 - Leucophores are similar to xanthophores in their specification and differentiation processes in medaka.
	slc2a15	ENSGT00760000119022	Kimura et al 2014 - Leucophores are similar to xanthophores in their specification and differentiation processes in medaka.
	xdh	ENSGT00390000003772	Braasch et al 2007 Evolution of pigment synthesis pathways by gene and genome duplication in fish
-------------------
Iridophores
-------------------
	chm	ENSGT00530000063044	Starr et al 2004 Mutation of the zebrafish choroideremia gene encoding Rab escort protein 1 devastates hair cells
	csf1	ENSGT00510000054743	Patterson and Parichy 2013 Interactions with Iridophores and the Tissue Environment Required for Patterning Melanophores and Xanthophores during Zebrafish Adult Pigment Stripe Formation
	ece2	ENSGT00760000119162	Mutant karneol; Krauss et al 2014 - Endothelin signalling in iridophore development and stripe pattern formation of zebrafish
	ednrb (ednrb1)	ENSGT00760000119177	Parichy et al. 2000 Mutational analysis of endothelin receptor b1 (rose) during neural crest and pigment pattern development in the zebrafish Danio rerio.
	fbxw4 (dac, hag)	ENSGT00390000005029	Kawakami et al 2000 Proviral insertions in the zebrafish hagoromo gene, encoding an F-box/WD40-repeat protein, cause stripe pattern anomalies
	fhl2	ENSGT00760000118910	Johannessen et al. (2006) The multifunctional roles of the four-and-a-half-LIM only protein FHL2.
	foxd3	ENSGT00760000118904	Curran et al 2010 Interplay between Foxd3 and Mitf regulates cell fate plasticity in the zebrafish neural crest.
	gart	ENSGT00390000000292	Ng et al 2009 Zebrafish mutations in gart and paics identify crucial roles for de novo purine synthesis in vertebrate pigmentation and ocular development.
	impdh1	ENSGT00530000062923	Li et al 2015 Integrative analysis of circadian transcriptome and metabolic network reveals the role of de novo purine synthesis in circadian control of cell cycle.
	ltk	ENSGT00760000118818	Lopes et al. 2008 Leukocyte tyrosine kinase functions in pigment cell development.
	med12 (trap230)	ENSGT00440000037505	Rau et al. 2006 Zebrafish Trap230/Med12 is required as a coactivator for Sox9-dependent neural crest, cartilage and ear development
	mpv17	ENSGT00530000063005	Krauss et al. 2013 transparent, a gene affecting stripe formation in Zebrafish, encodes the mitochondrial protein Mpv17 that is required for iridophore survival
	oca2	ENSGT00390000017120	Beirl et al 2014 oca2 Regulation of chromatophore differentiation and number is cell type specific in zebrafish.
	paics	ENSGT00390000010172	Ng et al 2009 Zebrafish mutations in gart and paics identify crucial roles for de novo purine synthesis in vertebrate pigmentation and ocular development
	pnp4	ENSGT00550000074740	Curran et al. (2010) Interplay between foxd3 and mitf regulates cell fate plasticity in the zebrafish neural crest cell
	sox10	ENSGT00760000118988	Dutton et al 2001 - Zebrafish colourless encodes sox10 and specifies non-ectomesenchymal neural crest fates.
	sox9	ENSGT00760000118988	Yan et al. 2005 A pair of Sox: distinct and overlapping functions of zebrafish sox9 co-orthologs in craniofacial and pectoral fin development
	tfap2a	ENSGT00550000074577	Knight et al. 2003 Skeletal and pigment cell defects in the lockjaw mutant reveal multiple roles for zebrafish tfap2a in neural crest development
	trim33	ENSGT00530000062982	Zfin
-------------------
Xanthophore differentiation
-------------------
	csf1r (fms)	ENSGT00760000118923	Parichy et al 2000 - An orthologue of the kit-related gene fms is required for development of neural crest-derived xanthophores and a subpopulation of adult melanocytes in the zebrafish, Danio rerio
	gch1	ENSGT00390000013481	Parichy et al 2000 - An orthologue of the kit-related gene fms is required for development of neural crest-derived xanthophores and a subpopulation of adult melanocytes in the zebrafish, Danio rerio
	gch2	ENSGT00390000013481	Watanabe 2008 Adult-type pigment cells, which color the ocular sides of flounders at metamorphosis, localize as precursor cells at the proximal parts of the dorsal and anal fins in early larvae	Nagao et al 2014 - Sox5 functions as a fate switch in medaka pigment cell development.
	ghr	ENSGT00530000063112	Fukamachi et al 2006 Medaka double mutants for color interfere and leucophore free: characterization of the xanthophore–somatolactin relationship using the leucophore free gene	Fukamachi and Meyer 2007 Evolution of Receptors for Growth Hormone and Somatolactin in Fish and Land Vertebrates: Lessons from the Lungfish and Sturgeon Orthologues
	leo1	ENSGT00550000074952	Nguyen 2011 - The Paf1 complex component Leo1 is essential for cardiac and neural crest development in zebrafish
	pax3	ENSGT00680000099553	Minchin JE, et al. (2008) Sequential actions of Pax3 and Pax7 drive xanthophore development in zebrafish neural crest.
	pax7	ENSGT00680000099553	Minchin JE, et al. (2008) Sequential actions of Pax3 and Pax7 drive xanthophore development in zebrafish neural crest.
	slc2a11	ENSGT00760000119022	Kimura et al 2014 - Leucophores are similar to xanthophores in their specification and differentiation processes in medaka.
	slc2a15	ENSGT00760000119022	Kimura et al 2014 - Leucophores are similar to xanthophores in their specification and differentiation processes in medaka.
	smtl	ENSGT00730000111012	Fukamachi et al 2004 Somatolactin selectively regulates proliferation and morphogenesis of neural-crest derived pigment cells in medaka
	sox10	ENSGT00760000118988	Dutton et al 2001 - Zebrafish colourless encodes sox10 and specifies non-ectomesenchymal neural crest fates.
	sox5	ENSGT00760000119274	Nagao et al 2014 - Sox5 functions as a fate switch in medaka pigment cell development.
-------------------
Pteridine synthesis
-------------------
	gart	ENSGT00390000000292	Ng et al 2009 Zebrafish mutations in gart and paics identify crucial roles for de novo purine synthesis in vertebrate pigmentation and ocular development.
	gchfr	ENSGT00440000033849	Braasch et al 2007 Evolution of pigment synthesis pathways by gene and genome duplication in fish
	mycbp2	ENSGT00390000011403	Braasch et al 2007 Evolution of pigment synthesis pathways by gene and genome duplication in fish
	paics	ENSGT00390000010172	Ng et al 2009 Zebrafish mutations in gart and paics identify crucial roles for de novo purine synthesis in vertebrate pigmentation and ocular development
	pcbd1	ENSGT00390000007221	Braasch et al 2007 Evolution of pigment synthesis pathways by gene and genome duplication in fish
	pcbd2	ENSGT00390000007221	Braasch et al 2007 Evolution of pigment synthesis pathways by gene and genome duplication in fish
	pts	ENSGT00390000002752	Braasch et al 2007 Evolution of pigment synthesis pathways by gene and genome duplication in fish
	qdpr	ENSGT00390000000470	Braasch et al 2007 Evolution of pigment synthesis pathways by gene and genome duplication in fish
	spr	ENSGT00440000033609	Braasch et al 2007 Evolution of pigment synthesis pathways by gene and genome duplication in fish
	xdh	ENSGT00390000003772	Braasch et al 2007 Evolution of pigment synthesis pathways by gene and genome duplication in fish
-------------------
Melanocyte development
-------------------
	adam17	ENSGT00670000097974	Sel et al 2012 Expression analysis of ADAM17 during mouse eye development
	adamts20	ENSGT00760000118880	Kelsh et al 2009 Stripes and belly-spots—A review of pigment cell morphogenesis in vertebrates
	adrb2	ENSGT00760000118774	Wang et al 2009 Zebrafish beta-adrenergic receptor mRNA expression and control of pigmentation.
	apc	ENSGT00530000063749	Traboulsi et al 1996 Pigmented ocular fundus lesions and APC mutations in familial adenomatous polyposis
	atp6v0b	ENSGT00550000075120	Lee et al 2008 Zebrafish blowout provides genetic evidence for Patched1-mediated negative regulation of Hedgehog signaling within the proximal optic vesicle of the vertebrate eye.
	bcl2	ENSGT00530000062935	Bouillet et al. 2001 Degenerative Disorders Caused by Bcl-2 Deficiency Prevented by Loss of Its BH3-Only Antagonist Bim
	bcl2l11 (bim)	ENSGT00390000003178	Bouillet et al. 2001 Degenerative Disorders Caused by Bcl-2 Deficiency Prevented by Loss of Its BH3-Only Antagonist Bim
	bloc1s6	ENSGT00510000047812	Moore et al. 1990 Interaction of the Murine dilute suppressor Gene (dsu) With Fourteen Coat Color Mutations
	bnc2	ENSGT00390000005844	Lang et al 2009 - Basonuclin-2 requirements for zebrafish adult pigment pattern development and female fertility.
	brsk2	ENSGT00830000128316	Tchekmedyian et al 2013 - Findings from the Peutz-Jeghers Syndrome Registry of Uruguay
	c10orf11 (oca7)	ENSGT00390000006581	Gronskov et al. (2013) Mutations in C10orf11, a Melanocyte-Differentiation Gene, Cause Autosomal-Recessive Albinism
	cited1 (msg)	ENSGT00530000063624	Shioda et al 1996 - msg1, a novel melanocyte-specific gene, encodes a nuclear protein and is associated with pigmentation.
	creb1	ENSGT00390000008655	Lin and Fisher 2007 Melanocyte biology and skin pigmentation
	csf1r (fms)	ENSGT00760000118923	Parichy et al 2000 - An orthologue of the kit-related gene fms is required for development of neural crest-derived xanthophores and a subpopulation of adult melanocytes in the zebrafish, Danio rerio
	dct (tyrp2)	ENSGT00500000044790	Guyonneau et al 2004 - Melanocytes and Pigmentation Are Affected in Dopachrome Tautomerase Knockout Mice	Jackson et al 1992 A second tyrosinase-related protein, TRP-2, maps to and is mutated at the mouse slaty locus
	dock7	ENSGT00760000119234	Moore et al 1990 Interaction of the Murine Dilute Suppressor Gene (Dsu) with Fourteen Coat Color Mutations
	ece1	ENSGT00760000119162	Yanagisawa et al 1998 Role of Endothelin-1/Endothelin-A Receptor–mediated Signaling Pathway in the aortic arch patterning in mice.
	eda	ENSGT00730000111220	Nakamura et al 2002 Mutant laboratory mice with abnormalities in pigmentation: annotated tables
	edar	ENSGT00730000111254	Hider et al 2013 Exploring signatures of positive selection in pigmentation candidate genes in populations of East Asian ancestry
	edn3	ENSGT00530000063310	Reid et al 1996 - Major defects in pigmentation in mouse; Multiple roles for endothelin in melanocyte development: regulation of progenitor number and stimulation of differentiation
	ednrb	ENSGT00760000119177	Jackson 1997 Homologous pigmentation mutations in human, mouse and other model organisms	Parichy et al. 2000 Mutational analysis of endothelin receptor b1 (rose) during neural crest and pigment pattern development in the zebrafish Danio rerio.
	ednrb2	ENSGT00760000119177	Pla et al 2005 Ednrb2 orients cell migration towards the dorsolateral neural crest pathway and promotes melanocyte differentiation
	egfr	ENSGT00760000118799	Quillen et al 2011 OPRM1 and EGFR contribute to skin pigmentation differences between Indigenous Americans and Europeans.
	en1	ENSGT00810000125411	Mellgren and Johnson 2002 The evolution of morphological complexity in zebrafish stripes
	erbb3	ENSGT00760000118799	Budi et al 2008 Embryonic requirements for ErbB signaling in neural crest development and adult pigment pattern formation
	fgfr2	ENSGT00760000118923	Rosenthal et al 2001 Fibroblast growth factor receptor 2 (FGFR2) in brain neurons and retinal pigment epithelial cells act via stimulation of neuroendocrine L-type channels (Cav1.3)
	frem2	ENSGT00550000074429	Kiyozumi et al 2007 Frem3, a member of the 12 CSPG repeats-containing extracellular matrix protein family, is a basement membrane protein with tissue distribution patterns distinct from those of Fras1, Frem2, and QBRICK/Frem1
	fzd4	ENSGT00760000118864	Hearing 2011 Genetics of Melanosome Structure and Function
	gata3	ENSGT00760000119221	Kurek et al 2007 Transcriptome and phenotypic analysis reveals Gata3-dependent signalling pathways in murine hair follicles.
	gch2	ENSGT00390000013481	Watanabe 2008 Adult-type pigment cells, which color the ocular sides of flounders at metamorphosis, localize as precursor cells at the proximal parts of the dorsal and anal fins in early larvae	Nagao et al 2014 - Sox5 functions as a fate switch in medaka pigment cell development.
	gfpt1	ENSGT00390000010049	Yang et al. 2007 Mutations in gfpt1 and skiv2l2 Cause Distinct Stage-Specific Defects in Larval Melanocyte Regeneration in Zebrafish
	gja5 (cx41.8)	ENSGT00840000129674	Watanabe et al 2006 Spot pattern of leopard Danio is caused by mutation in the zebrafish connexin41.8 gene
	gli3	ENSGT00390000010049	Matera et al. 2008 A sensitized mutagenesis screen identifies Gli3 as a modifier of Sox10 neurocristopathy	Reinhardt et al 2015 Sox2, Tlx, Gli3, and Her9 converge on Rx2 to define retinal stem cells in vivo
	gna11	ENSGT00760000118851	Lin et al (2007) Melanocyte biology and skin pigmentation
	gnaq	ENSGT00760000118851	Lin et al (2007) Melanocyte biology and skin pigmentation
	gpc3	ENSGT00550000074430	Lamoreux et al 2010 The Colors of Mice: A Model Genetic Network
	gpr161	ENSGT00790000123027	Korstanje et al 2008 - Quantitative trait loci affecting phenotypic variation in the vacuolated lens mouse mutant, a multigenic mouse model of neural tube defects
	hdac1	ENSGT00530000062889	Pillai et al. 2004 Histone deacetylase 1 (HDAC-1) required for the normal formation of craniofacial cartilage and pectoral fins of the zebrafish
	hps1	ENSGT00390000015298	Nguyen and Wei 2007 Hermansky–Pudlak HPS1/pale ear Gene Regulates Epidermal and Dermal Melanocyte Development
	hps4	ENSGT00390000007349	Suzuki et al 2002 Hermansky-Pudlak syndrome is caused by mutations in HPS4, the human homolog of the mouse light-ear gene
	hps6	ENSGT00390000001546	Daly et al 2013 snow white, a Zebrafish Model of Hermansky-Pudlak Syndrome Type 5
	hsd3b1	ENSGT00550000074557	Lin et al 2015 Two Zebrafish hsd3b Genes Are Distinct in Function, Expression, and Evolution.
	igsf11	ENSGT00760000119145	Eom et al 2012 Melanophore Migration and Survival during Zebrafish Adult Pigment Stripe Development Require the Immunoglobulin Superfamily Adhesion Molecule Igsf11
	ikbkg	ENSGT00530000063808	Bennet and Lamoreux 2003 The color loci of mice–a genetic century
	impdh1	ENSGT00530000062923	Li et al 2015 Integrative analysis of circadian transcriptome and metabolic network reveals the role of de novo purine synthesis in circadian control of cell cycle.
	irf4	ENSGT00760000119093	Praetorius et al 2013 A polymorphism in IRF4 affects human pigmentation through a tyrosinase-dependent MITF/TFAP2A pathway
	itgb1	ENSGT00760000119064	Lamoreux et al 2010 The Colors of Mice: A Model Genetic Network
	kcnj13 (kir7.1)	ENSGT00830000128392	Iwashita et al. 2006 Pigment pattern in jaguar/obelix zebrafish is caused by a Kir7.1 mutation: implications for the regulation of melanosome movement.
	kit	ENSGT00760000118923	Bernex et al 1996 - Spatial and temporal patterns of c-kit-expressing cells in WlacZ/+ and WlacZ/WlacZ mouse embryos.
	kitlg	ENSGT00510000051122	Dooley et al 2013 - On the embryonic origin of adult melanophores: the role of ErbB and Kit signalling in establishing melanophore stem cells in zebrafish
	krtap21-1	ENSGT00860000135100	Kurek et al 2007 Transcriptome and phenotypic analysis reveals Gata3-dependent signalling pathways in murine hair follicles.
	lmx1a	ENSGT00760000118921	Chizhikov et al 2006 Molecular definition of an allelic series of mutations disrupting the mouse Lmx1a (dreher) gene
	mbtps1	ENSGT00490000043404	Rutschmann et al 2012 Hypopigmentation and Maternal-Zygotic Embryonic Lethality Caused by a Hypomorphic Mbtps1 Mutation in Mice
	mcoln3	ENSGT00390000017126	Di Palma et al 2002 Mutations in Mcoln3 associated with deafness and pigmentation defects in varitint-waddler (Va) mice
	mef2c	ENSGT00390000011828	Agarwal et al 2011 The MADS box transcription factor MEF2C regulates melanocyte development and is a direct transcriptional target and partner of SOX10.
	mib1	ENSGT00790000122981	Zhang et al 2007 - The characterization of zebrafish antimorphic mib alleles reveals that Mib and Mind bomb-2 (Mib2) function redundantly
	mib2	ENSGT00790000122981	Zhang et al 2007 - The characterization of zebrafish antimorphic mib alleles reveals that Mib and Mind bomb-2 (Mib2) function redundantly
	mitf	ENSGT00390000004402	Tassabehji et al 1994 - Waardenburg syndrome type 2 caused by mutations in the human microphthalmia (MITF) gene.
	mreg	ENSGT00390000008926	Sdamek-Poprawa et al 2009 Melanoregulin (MREG) modulates lysosome function in pigment epithelial cells
	myc	ENSGT00510000046414	Lamoreux et al 2010 The Colors of Mice: A Model Genetic Network
	myo5a	ENSGT00810000125360	O'Sullivan et al 2004 dsu functions in a MYO5A-independent pathway to suppress the coat color of dilute mice
	nrg1	ENSGT00800000124099	Buac et al 2009 NRG1/ERBB3 signaling in melanocyte development and melanoma: inhibition of differentiation and promotion of proliferation
	oca2	ENSGT00390000017120	Beirl et al. 2014 oca2 regulation of chromatophore differentiation and number is cell type specific in zebrafish
	oprm1	ENSGT00760000118797	Quillen et al 2011 OPRM1 and EGFR contribute to skin pigmentation differences between Indigenous Americans and Europeans	Hider et al 2013 Exploring signatures of positive selection in pigmentation candidate genes in populations of East Asian ancestry
	psen1	ENSGT00390000016593	Newman et al 2009 - Altering presenilin gene activity in zebrafish embryos causes changes in expression of genes with potential involvement in Alzheimer's disease pathogenesis.
	rab27a	ENSGT00830000128327	Futter et al 2004 The Role of Rab27a in the Regulation of Melanosome Distribution within Retinal Pigment Epithelial Cells
	recql4	ENSGT00550000074520	Mann et al 2005 Defective sister-chromatid cohesion, aneuploidy and cancer predisposition in a mouse model of type II Rothmund-Thomson syndrome.
	rnf41 (nrdp1)	ENSGT00530000063647	Maddirevula et al 2011 - Nrdp1 governs differentiation of the melanocyte lineage via Erbb3b signaling in the zebrafish embryogenesis.
	scarb2	ENSGT00530000062927	Adameyko et al 2012 - Sox2 and Mitf cross-regulatory interactions consolidate progenitor and melanocyte lineages in the cranial neural crest.
	scg2	ENSGT00390000010895	Sivka et al 2013 Identification of candidate genes involved in marble color pattern formation in genus Salmo.
	sf3b1	ENSGT00390000018393	An et al 2012 The zebrafish sf3b1b460 mutant reveals differential requirements for the sf3b1 pre-mRNA processing gene during neural crest development.
	sfxn1	ENSGT00390000002026	Lamoreux et al 2010 The Colors of Mice: A Model Genetic Network
	skiv2l2	ENSGT00820000127042	Yang et al. 2007 Mutations in gfpt1 and skiv2l2 Cause Distinct Stage-Specific Defects in Larval Melanocyte Regeneration in Zebrafish
	slc24a5	ENSGT00760000119209	Lamason et al 2005 - SLC24A5, a Putative Cation Exchanger, Affects Pigmentation in Zebrafish and Humans
	slc45a2 (matp)	ENSGT00390000018882	Haffter et al 1996 - Mutations affecting pigmentation and shape of the adult zebrafish.
	snai2	ENSGT00390000011027	Cobaleda et al 2007 Function of the Zinc-Finger Transcription Factor SNAI2 in Cancer and Development
	sox10	ENSGT00760000118988	Dutton et al 2001 - Zebrafish colourless encodes sox10 and specifies non-ectomesenchymal neural crest fates.
	sox18	ENSGT00760000118988	Pennisi et al 2000 Mice Null for Sox18 Are Viable and Display a Mild Coat Defect
	sox2	ENSGT00760000118988	Adameyko et al 2012 - Sox2 and Mitf cross-regulatory interactions consolidate progenitor and melanocyte lineages in the cranial neural crest.
	sox9	ENSGT00760000118988	Yan et al. 2005 A pair of Sox: distinct and overlapping functions of zebrafish sox9 co-orthologs in craniofacial and pectoral fin development
	tfap2a	ENSGT00550000074577	Knight et al. 2003 Skeletal and pigment cell defects in the lockjaw mutant reveal multiple roles for zebrafish tfap2a in neural crest development
	tfap2e	ENSGT00550000074577	Van Otterloo et al 2010 - Differentiation of Zebrafish Melanophores Depends on Transcription Factors AP2 Alpha and AP2 Epsilon
	tpcn2	ENSGT00530000063660	Sulem et al 2008 Two newly identified genetic determinants of pigmentation in Europeans
	trpm7	ENSGT00760000119127	McNeill et al 2007 - Cell death of melanophores in zebrafish trpm7 mutant embryos depends on melanin synthesis.
	tyr	ENSGT00500000044790	Jackson and Bennett 1990 - Identification of the albino mutation of mouse tyrosinase by analysis of an in vitro revertant	Haffter et al 1996 - Mutations affecting pigmentation and shape of the adult zebrafish	Iida et al 2004 - The tyrosinase gene of the i(b) albino mutant of the medaka fish carries a transposable element insertion in the promoter region	Braasch et al 2009 pigmentary function and evolution of tyrp1 gene duplicates in fish
	tyrp1	ENSGT00500000044790	Mutant brown in mouse; del Marmol and Beermann 1999 - Tyrosinase and related proteins in mammalian pigmentation
	usp13	ENSGT00390000000874	Zhao et al 2011 Regulation of MITF stability by the USP13 deubiquitinase
	vps11	ENSGT00390000015058	Mutants have abnormal melanophore morphology and reduced survival; Clancey et al 2013 - Maintenance of Melanophore Morphology and Survival Is Cathepsin and vps11 Dependent in Zebrafish
	vps18	ENSGT00390000015233	Mutans have fewer melanosomes in RPE; Maldonado et al 2006 - The zebrafish mutant vps18 as a model for vesicle-traffic related hypopigmentation diseases
	wnt1	ENSGT00760000118943	Dunn et al 2000 Neural crest-directed gene transfer demonstrates Wnt1 role in melanocyte expansion and differentiation during mouse development	Dorsky et al 1998 Control of neural crest cell fate by the Wnt signalling pathway
	wnt3a	ENSGT00760000118943	Dunn et al 2005 WNT1 and WNT3a promote expansion of melanocytes through distinct modes of action	Dorsky et al 1998 Control of neural crest cell fate by the Wnt signalling pathway
	zic2	ENSGT00760000118771	Elms et al 2003 Zic2 is required for neural crest formation and hindbrain patterning during mouse development
-------------------
Melanogenesis regulation
-------------------
	asip1	ENSGT00510000048661	Kanetsky et al 2002 A polymorphism in the agouti signaling protein gene is associated with human pigmentation
	atrn	ENSGT00390000001118	He et al 2001 A biochemical function for attractin in agouti-induced pigmentation and obesity
	c12orf10 (myg1)	ENSGT00390000010265	Philips et al (2010) Promoter polymorphism -119C/G in MYG1 (C12orf10) gene is related to vitiligo susceptibility and Arg4Gln affects mitochondrial entrance of Myg1
	clcn7	ENSGT00760000119109	Weinert et al 2014 Transport activity and presence of ClC‐7/Ostm1 complex account for different cellular functions
	corin	ENSGT00870000136375	Enshell-Seijffers et al 2008 The serine protease Corin is a novel modifier of the Agouti pathway.
	ctns	ENSGT00390000005338	Chiaverini et al 2012 Cystinosin is a melanosomal protein that regulates melanin synthesis.
	defb103a	ENSGT00530000064280	Beaumont et al 2012 Melanocortin-1 receptor-mediated signalling pathways activated by NDP-MSH and HBD3 ligands
	drd2	ENSGT00760000118795	Shriver et al 2003 Skin pigmentation, biogeographical ancestry and admixture mapping
	gart	ENSGT00390000000292	Ng et al 2009 Zebrafish mutations in gart and paics identify crucial roles for de novo purine synthesis in vertebrate pigmentation and ocular development.
	krt2a	ENSGT00760000118796	Fitch et al 2003 Genetics of dark skin in mice.
	mc1r	ENSGT00770000120529	Flanagan et al 2000 Pleiotropic effects of the melanocortin 1 receptor (MC1R) gene on human pigmentation
	mgrn1	ENSGT00390000009925	Cota et al 2006 Mice with mutations in Mahogunin ring finger‐1 (Mgrn1) exhibit abnormal patterning of the left–right axis
	nf1	ENSGT00550000074797	Mashour et al 1999 Induction of melanogenic abnormalities in NF1+/- mutant mice by DMBA.
	ostm1	ENSGT00390000012341	Weinert et al 2014 Transport activity and presence of ClC‐7/Ostm1 complex account for different cellular functions
	pah	ENSGT00390000010268	Sturm et al 2012 Human pigmentation genes under environmental selection
	paics	ENSGT00390000010172	Ng et al 2009 Zebrafish mutations in gart and paics identify crucial roles for de novo purine synthesis in vertebrate pigmentation and ocular development
	pomc	ENSGT00390000016811	Krude et al 1998 Severe early-onset obesity, adrenal insufficiency and red hair pigmentation caused by POMC mutations in humans
	rab32	ENSGT00760000119125	Wasmeier et al 2006 - Rab38 and Rab32 control post-Golgi trafficking of melanogenic enzymes
	rab38	ENSGT00760000119125	Loftus et al 2002 – Mutation of melanosome protein RAB38 in chocolate mice
	shroom2	ENSGT00530000063061	Fairbank et al 2006 Shroom2 (APXL) regulates melanosome biogenesis and localization in the retinal pigment epithelium.
	slc7a11	ENSGT00760000119037	Chintala et al. 2005 Slc7a11 gene controls production of pheomelanin pigment and proliferation of cultured cells.
	ugt1a8	ENSGT00760000118949	Jacobs et al 2013 Comprehensive candidate gene study highlights UGT1A and BNC2 as new genes determining continuous skin color variation in Europeans
	zeb2	ENSGT00630000089829	Denecker et al 2014 Identification of a ZEB2-MITF-ZEB1 transcriptional network that controls melanogenesis and melanoma progression.
-------------------
Melanosome transport
-------------------
	agrp2	ENSGT00730000112562	Zhang et al 2010 Pineal-specific agouti protein regulates teleost background adaptation
	crh	ENSGT00510000048573	Wagle et al 2011 Corticotropin-releasing factor critical for zebrafish camouflage behavior is regulated by light and sensitive to ethanol.
	dctn1	ENSGT00760000119173	Ohbayashi et al 2012 Melanoregulin regulates retrograde melanosome transport through interaction with the RILP-p150Glued complex in melanocytes.
	dctn2	ENSGT00390000003427	Ohbayashi et al 2012 Melanoregulin regulates retrograde melanosome transport through interaction with the RILP-p150Glued complex in melanocytes.
	ippk	ENSGT00390000010053	Sarmah et al 2007 A role for the inositol kinase Ipk1 in ciliary beating and length maintenance.
	map2k1	ENSGT00760000119199	Deacon et al 2005 Regulation of bidirectional melanosome transport by organelle bound MAP kinase.
	mlph	ENSGT00390000013933	Drogemuller et al 2007 A noncoding melanophilin gene (MLPH) SNP at the splice donor of exon 1 represents a candidate causal mutation for coat color dilution in dogs
	myo7a	ENSGT00810000125360	Gibbs et al 2009 Retinal pigment epithelium defects in humans and mice with mutations in MYO7A: imaging melanosome-specific autofluorescence
	pmel	ENSGT00530000063573	Burgoyne et al 2015 Regulation of melanosome number, shape and movement in the zebrafish retinal pigment epithelium by OA1 and PMEL	Berson et al 2001 Pmel17 initiates premelanosome morphogenesis within multivesicular bodies.
	rab11a	ENSGT00760000118841	Beaumont et al 2011 The recycling endosome protein Rab17 regulates melanocytic filopodia formation and melanosome trafficking.
	rab11b	ENSGT00760000118841	Beaumont et al 2011 The recycling endosome protein Rab17 regulates melanocytic filopodia formation and melanosome trafficking.
	rab17	ENSGT00760000119101	Beaumont et al 2011 The recycling endosome protein Rab17 regulates melanocytic filopodia formation and melanosome trafficking.
	rab1a	ENSGT00760000118937	Ishida et al 2012 Functional involvement of Rab1A in microtubule-dependent anterograde melanosome transport in melanocytes.
	rab3ip	ENSGT00390000009036	Westlake et al 2011 Primary cilia membrane assembly is initiated by Rab11 and transport protein particle II (TRAPPII) complex-dependent trafficking of Rabin8 to the centrosome.
	rab8a	ENSGT00760000118937	Nachury et al 2007 A core complex of BBS proteins cooperates with the GTPase Rab8 to promote ciliary membrane biogenesis.
	ric8b (synbl)	ENSGT00390000014700	Nagayoshi et al 2008 - Insertional mutagenesis by the Tol2 transposon-mediated enhancer trap approach generated mutations in two developmental genes: tcf7 and synembryn-like.
	tmem33	ENSGT00390000011368	Moshier et al 2014 The Two-pore channel (TPC) interactome unmasks isoform-specific roles for TPCs in endolysosomal morphology and cell pigmentation
	tpcn2	ENSGT00530000063660	Sulem et al 2008 Two newly identified genetic determinants of pigmentation in Europeans
	trappc6a	ENSGT00390000012948	Gwynn et al 2006 A mouse TRAPP-related protein is involved in pigmentation
-------------------
Melanosome biogenesis
-------------------
	ankrd27 (varp)	ENSGT00780000121977	Tamura et al 2009 - Varp Is a Novel Rab32/38-binding Protein That Regulates Tyrp1 Trafficking in Melanocytes
	ap1g1	ENSGT00390000012618	Bultema et al 2012 - BLOC-2, AP-3, and AP-1 proteins function in concert with Rab38 and Rab32 proteins to mediate protein trafficking to lysosome-related organelles.
	ap1m1	ENSGT00530000062779	Bultema et al 2012 - BLOC-2, AP-3, and AP-1 proteins function in concert with Rab38 and Rab32 proteins to mediate protein trafficking to lysosome-related organelles.
	ap3b1	ENSGT00530000063546	Yang et al 2000 Defective organellar membrane protein trafficking in Ap3b1-deficient cells
	ap3d1	ENSGT00550000075067	Bultema et al 2012 - BLOC-2, AP-3, and AP-1 proteins function in concert with Rab38 and Rab32 proteins to mediate protein trafficking to lysosome-related organelles.
	arcn1	ENSGT00390000017207	Xu et al 2010 Mutation in archain 1, a subunit of COPI coatomer complex, causes diluted coat color and Purkinje cell degeneration.
	bloc1s1	ENSGT00390000002689	Starcevic and Dell'Angelica 2004 Identification of snapin and three novel proteins (BLOS1, BLOS2, and BLOS3/reduced pigmentation) as subunits of biogenesis of lysosome-related organelles complex-1 (BLOC-1).
	bloc1s2	ENSGT00390000005889	Starcevic and Dell'Angelica 2004 Identification of snapin and three novel proteins (BLOS1, BLOS2, and BLOS3/reduced pigmentation) as subunits of biogenesis of lysosome-related organelles complex-1 (BLOC-1).
	bloc1s3	ENSGT00390000008756	Setty et al 2007 - BLOC-1 is required for cargo-specific sorting from vacuolar early endosomes toward lysosome-related organelles.
	bloc1s4 (cno)	ENSGT00390000006790	Gwynn et al 2000 Defects in the cappuccino (cno) gene on mouse chromosome 5 and human 4p cause Hermansky-Pudlak syndrome by an AP-3–independent mechanism
	bloc1s5	ENSGT00390000016974	Setty et al 2007 - BLOC-1 is required for cargo-specific sorting from vacuolar early endosomes toward lysosome-related organelles.
	bloc1s6 (pldn)	ENSGT00530000064085	Falcon-Perez and Dell'angelica 2002 The Pallidin (Pldn) Gene and the Role of SNARE Proteins in Melanosome Biogenesis
	cd63	ENSGT00760000118875	van Niel et al 2011 - The tetraspanin CD63 regulates ESCRT-independent and -dependent endosomal sorting during melanogenesis.
	dtnbp1	ENSGT00390000010667	Myles et al 2007 Identifying genes underlying skin pigmentation differences among human populations
	fig4	ENSGT00550000074943	Chow et al 2007 Mutation of FIG4 causes neurodegeneration in the pale tremor mouse and patients with CMT4J
	gpr143	ENSGT00390000016722	Xiao et al 2009 Iris hyperpigmentation in a Chinese family with ocular albinism and the GPR143 mutation
	hps3	ENSGT00390000015458	Spritz et al 2003 Human and mouse disorders of pigmentation
	hps5	ENSGT00530000063527	Spritz et al 2003 Human and mouse disorders of pigmentation
	kif13a	ENSGT00830000128238	Delevoye et al 2009 AP-1 and KIF13A coordinate endosomal sorting and positioning during melanosome biogenesis.
	lyst	ENSGT00760000119083	Barbosa et al 1996 Identification of the homologous beige and Chediak-Higashi syndrome genes
	mlana	ENSGT00390000009531	De Mazière et al 2002 The melanocytic protein Melan-A/MART-1 has a subcellular localization distinct from typical melanosomal proteins.
	nsf	ENSGT00530000064085	Amsterdam et al 2004 Submission and curation of data from an insertional mutagenesis screen
	pmel	ENSGT00530000063573	Burgoyne et al 2015 Regulation of melanosome number, shape and movement in the zebrafish retinal pigment epithelium by OA1 and PMEL
	rabggta	ENSGT00550000075121	Taibjee et al 2004 Abnormal pigmentation in hypomelanosis of Ito and pigmentary mosaicism: the role of pigmentary genes
	snapin	ENSGT00390000008274	Lee et al 2012 Assembly and architecture of biogenesis of lysosome-related organelles complex-1 (BLOC-1).
	th	ENSGT00390000010268	Marles et al 2003 Tyrosine hydroxylase isoenzyme I is present in human melanosomes: a possible novel function in pigmentation.
	trappc6a	ENSGT00390000012948	Gwynn et al 2006 A mouse TRAPP-related protein is involved in pigmentation
	txndc5	ENSGT00730000110455	Jeong et al 2010 Association of TXNDC5 gene polymorphisms and susceptibility to nonsegmental vitiligo in the Korean population
	vps33a	ENSGT00530000063488	Suzuki et al 2003 The mouse organellar biogenesis mutant buff results from a mutation in Vps33a, a homologue of yeast vps33 and Drosophila carnation
	vps39	ENSGT00530000063596	Navarro et al 2008 Pigment dilution mutants from fish models with connection to lysosome-related organelles and vesicular traffic genes
-------------------
Components of melanosomes
-------------------
	gpnmb	ENSGT00530000063573	Zhang et al 2013 Endothelin-1 enhances the melanogenesis via MITF-GPNMB pathway.
	rab32	ENSGT00760000119125	Wasmeier et al 2006 - Rab38 and Rab32 control post-Golgi trafficking of melanogenic enzymes
	rab38	ENSGT00760000119125	Loftus et al 2002 – Mutation of melanosome protein RAB38 in chocolate mice
	sdcbp	ENSGT00390000014465	Basrur et al 2003 Proteomic Analysis of Early Melanosomes: Identification of Novel Melanosomal Proteins
	slc24a4	ENSGT00760000119209	Sulem et al 2008 Two newly identified genetic determinants of pigmentation in Europeans
	trpm1	ENSGT00760000119127	Oancea et al. 2009 TRPM1 Forms Ion Channels Associated with Melanin Content in Melanocytes
	tspan10	ENSGT00870000136404	Basrur et al 2003 Proteomic Analysis of Early Melanosomes: Identification of Novel Melanosomal Proteins
	vat1	ENSGT00550000074483	Basrur et al 2003 Proteomic Analysis of Early Melanosomes: Identification of Novel Melanosomal Proteins
